# Supplementary material
Source: Springer Nature journal article supplement (https://www.springermedizin.de/resource/supplementary/12913_2012_2130_MOESM2_ESM.pdf/9530040)

**Males:**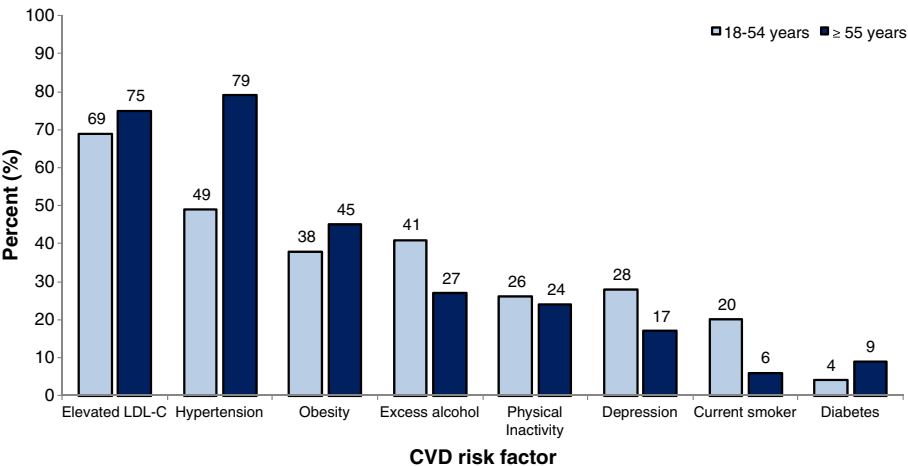**Females:**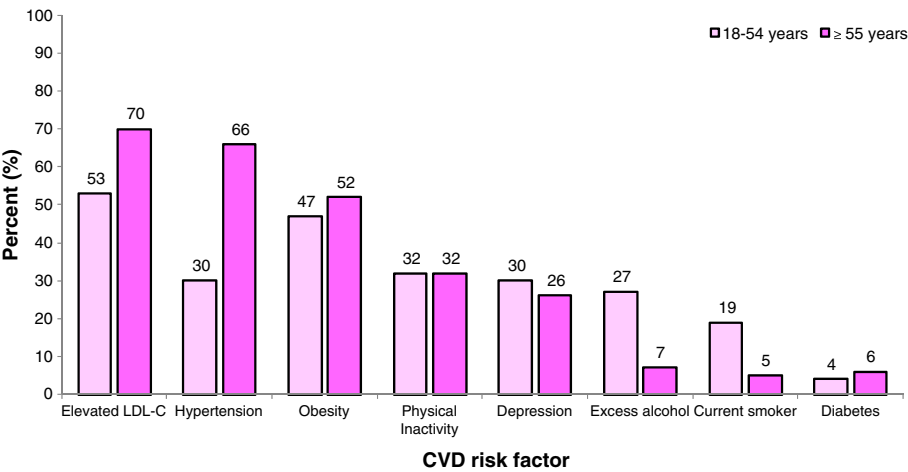

Supplement: MOESM2 [file 9530040]
